# Supplementary figures and images for: Quantitative proteomic analysis for radiation-induced cell cycle suspension in 92-1 melanoma cell line
Source: PubMed Central journal article supplement — J Radiat Res. 2013 Feb 26;54(4):649–62. doi: 10.1093/jrr/rrt010 (PMC3709680; doi:10.1093/jrr/rrt010), 2013-02-26

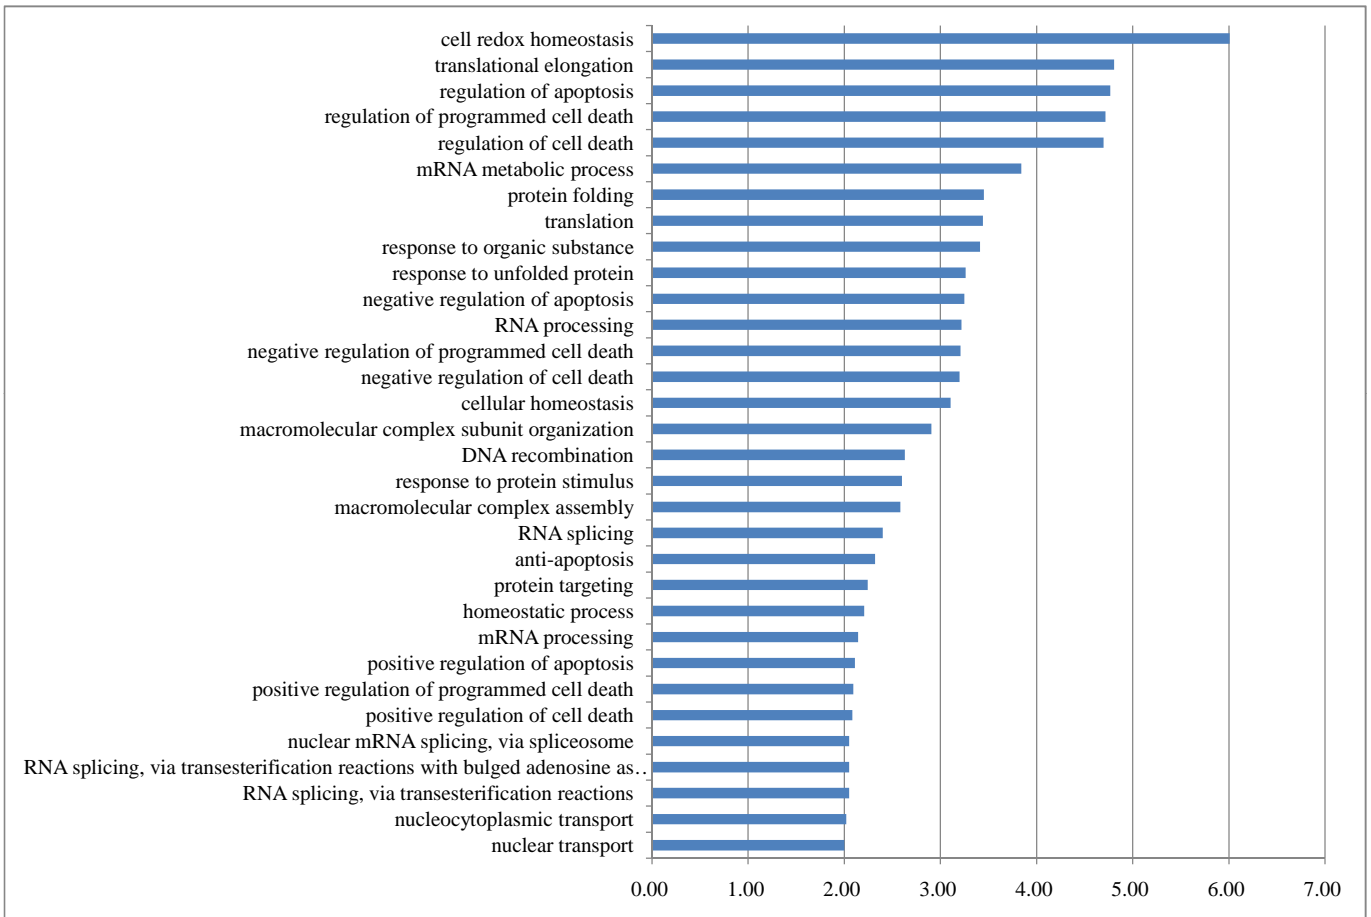

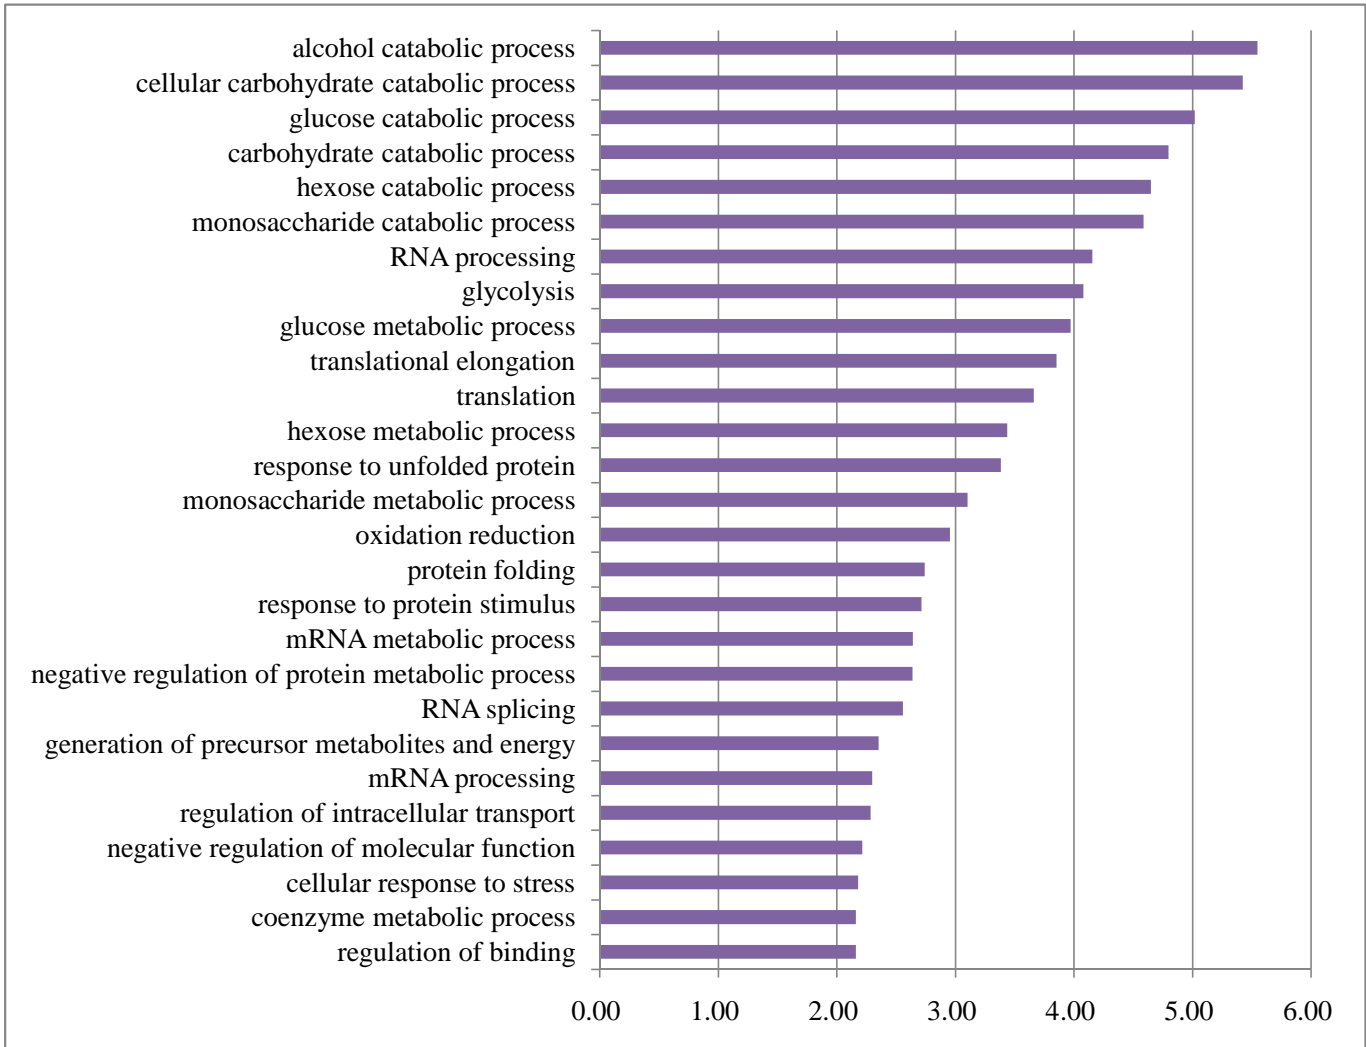

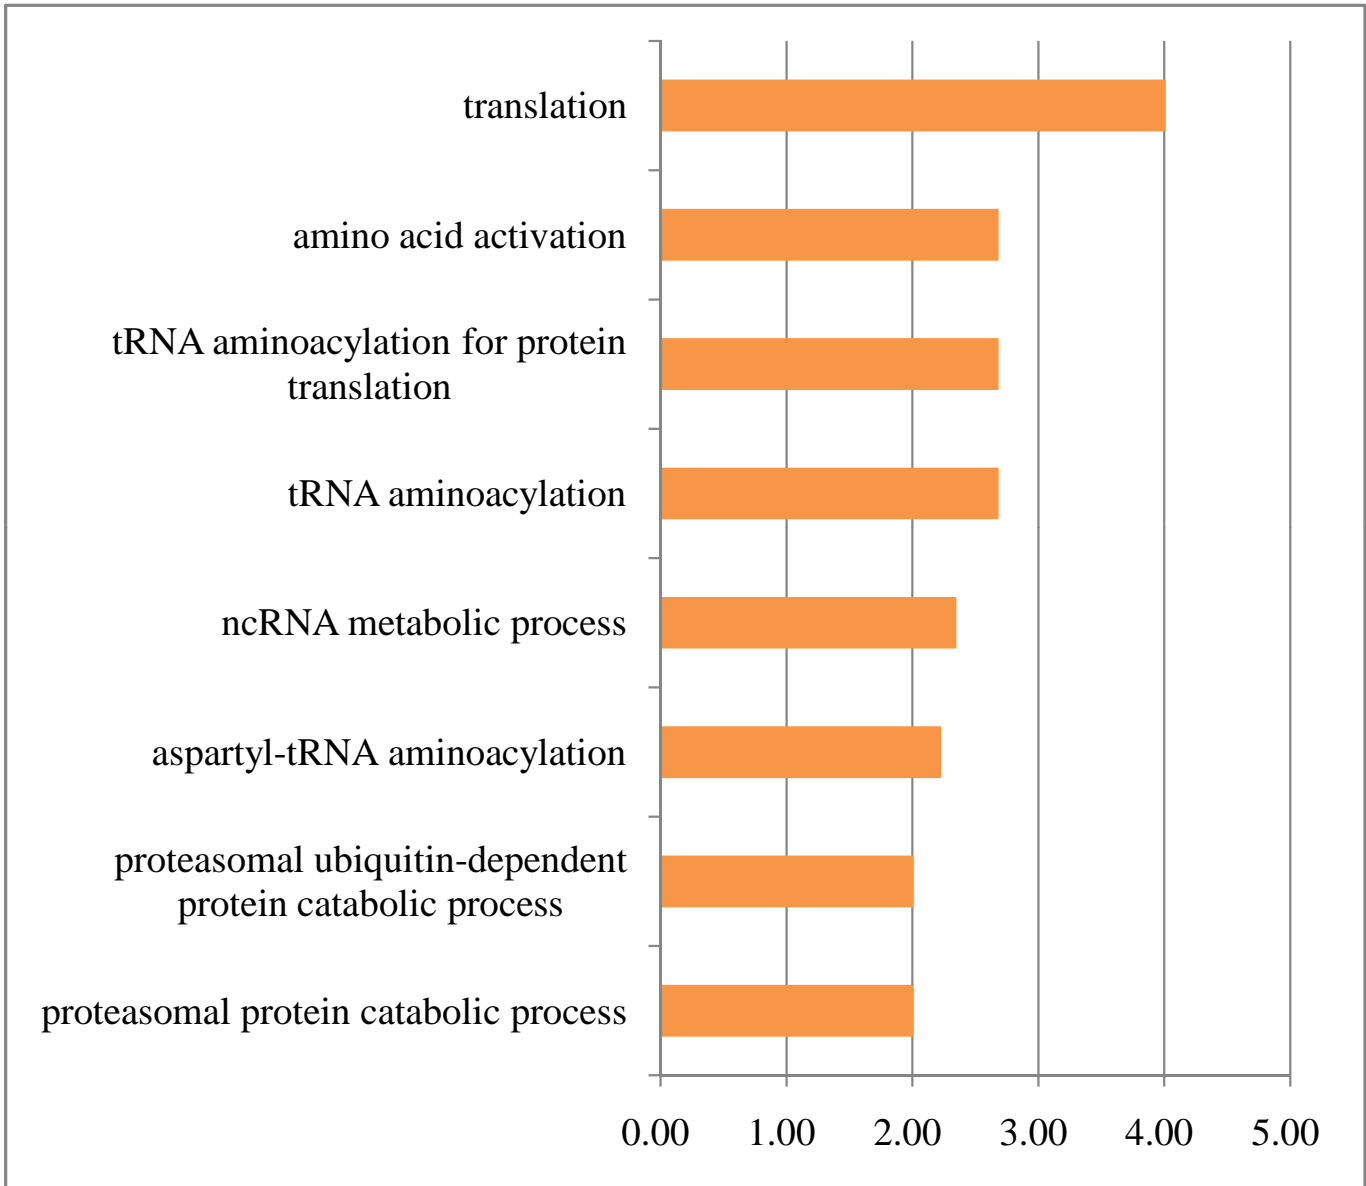

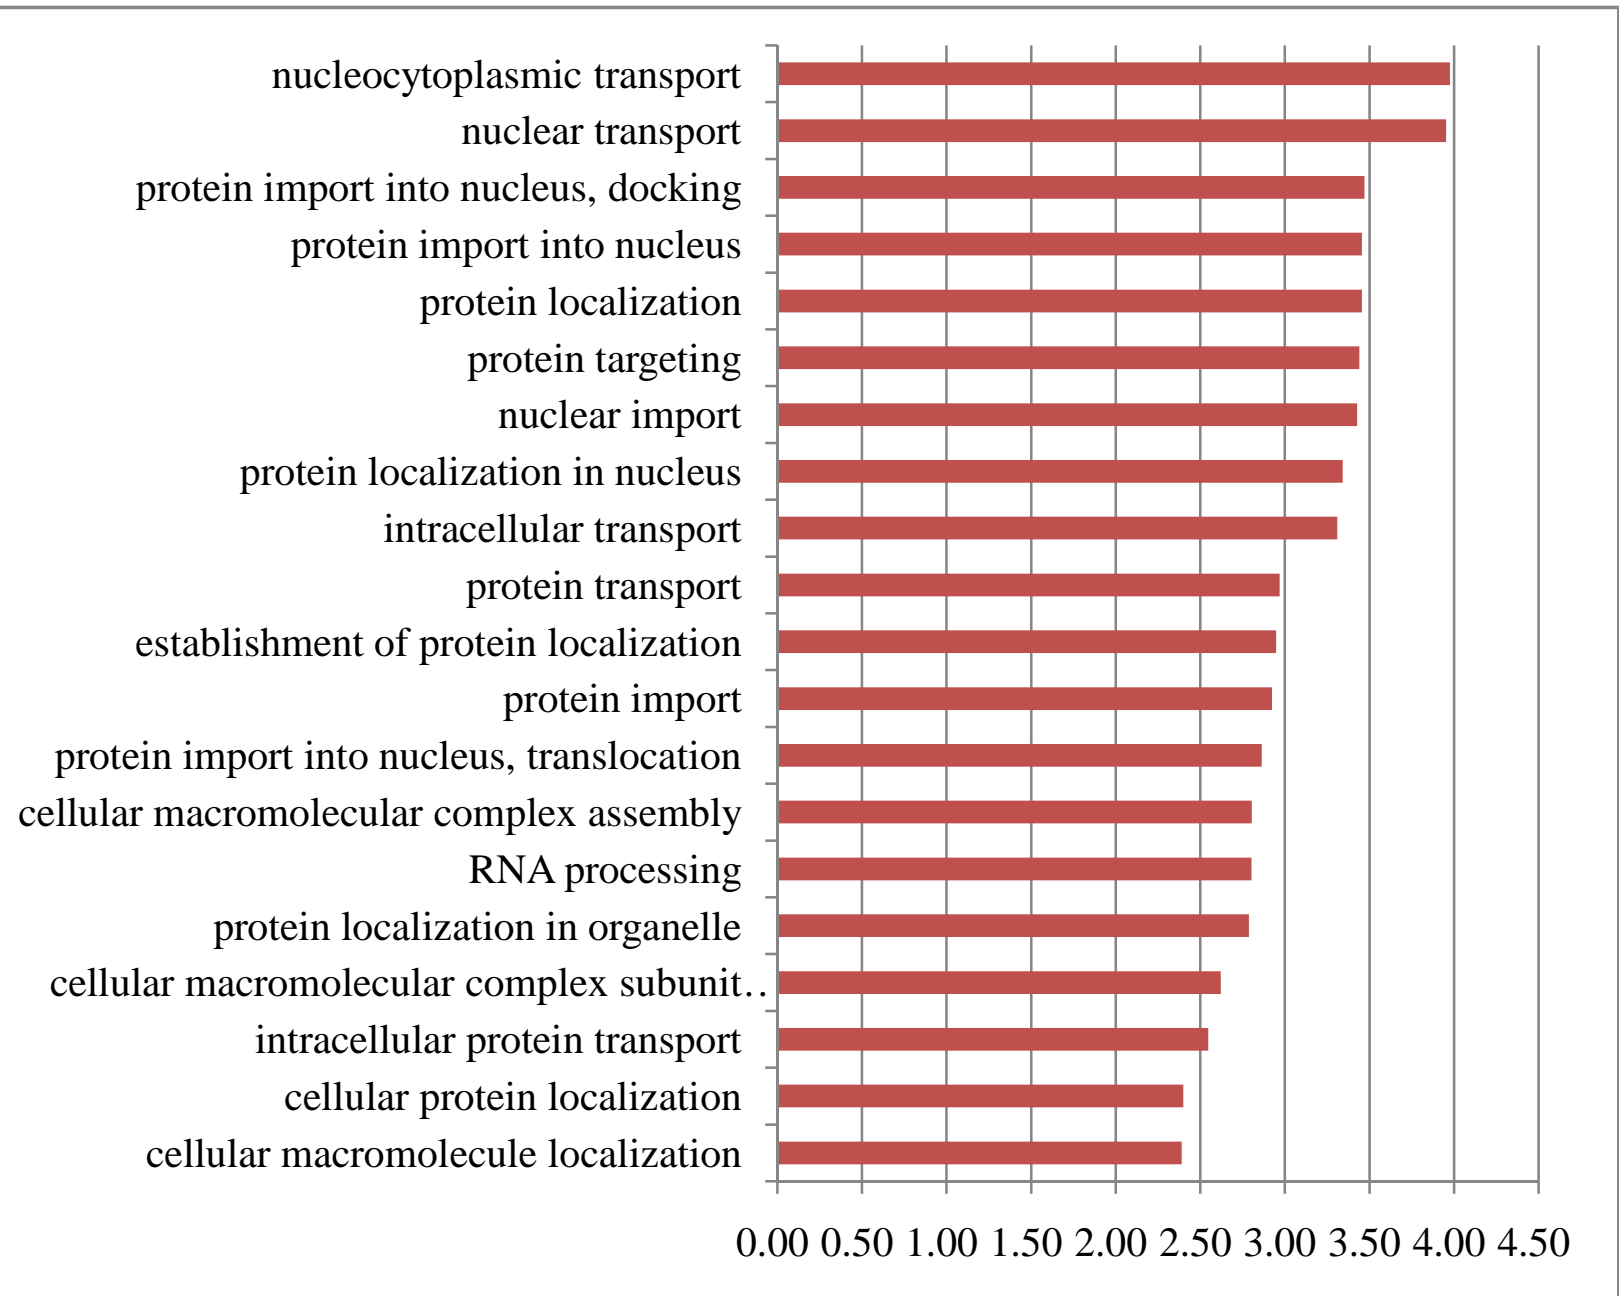

Supplement: supp_rrt010_rrt010supp_fig1.pdf [file supp_rrt010_rrt010supp_fig1.pdf]
